# Supplementary material for: Association of Household Exposure to Primary Clostridioides difficile Infection With Secondary Infection in Family Members
Source: PubMed Central journal article supplement (PMC7320299; doi:10.1001/jamanetworkopen.2020.8925), 2020-06-26
Supplement: jamanetwopen-3-e208925-s001.pdf [file jamanetwopen-3-e208925-s001.pdf]

## Supplementary Online Content

Miller AC, Segre AM, Pemmeraju SV, Sewell DK, Polgreen PM. Association of household exposure to primary *Clostridioides difficile* infection with secondary infection in family members. *JAMA Netw Open*. 2020;3(6):e208925. doi:10.1001/jamanetworkopen.2020.8925

**eTable 1.** Results Using CDI Cases Validated Through Antibiotic Treatment or Subsequent CDI Hospitalization

**eTable 2.** Results for Hospital Onset CDI Cases

This supplementary material has been provided by the authors to give readers additional information about their work.

## Supplementary Material: Validation Results

**eTable 1. Results using CDI cases validated through antibiotic treatment or subsequent CDI hospitalization.** In total 142,090 CDI cases occurred in inpatient settings or were validated by outpatient treatment or hospitalization. A total of 51,878 of the 134,606 community-onset CDI cases were validated by subsequent antibiotic treatment or hospitalization.

| Coefficient                                   | Any CDI<br>(N CDI Cases = 142,090) |                 | Community Onset CDI<br>(N CDI Cases = 51,878) |                 | Community Onset CDI and<br>No Prior Hospitalization<br>(N CDI Cases = 39,761) |                 |
|-----------------------------------------------|------------------------------------|-----------------|-----------------------------------------------|-----------------|-------------------------------------------------------------------------------|-----------------|
|                                               | Estimate                           | 95% CI          | Estimate                                      | 95% CI          | Estimate                                                                      | 95% CI          |
| <b>(Intercept)</b>                            | 0                                  | (0-0)           | 0                                             | (0-0)           | 0                                                                             | (0-0)           |
| <b>Family Exposure</b>                        | 8.351                              | (5.097-12.768)  | 10.689                                        | (6.464-16.459)  | 13.261                                                                        | (6.803-22.93)   |
| <b>Family Exposure: dependent (age 18-26)</b> | 0.953                              | (0.034-5.169)   | 1.405                                         | (0.135-5.825)   | 1.129                                                                         | (0.055-6.048)   |
| <b>Prior Hospitalization</b>                  | 16.741                             | (15.733-17.806) | 9.934                                         | (9.178-10.743)  | N/A                                                                           |                 |
| <b>Prior antibiotic use</b>                   |                                    |                 |                                               |                 |                                                                               |                 |
| None                                          | (reference)                        |                 | (reference)                                   |                 | (reference)                                                                   |                 |
| Low-risk antibiotic                           | 3.902                              | (3.607-4.215)   | 5.829                                         | (5.319-6.379)   | 6.783                                                                         | (6.012-7.636)   |
| High-risk antibiotic                          | 10.24                              | (9.59-10.929)   | 19.071                                        | (17.682-20.565) | 30.445                                                                        | (27.682-33.475) |
| <b>Age Group</b>                              |                                    |                 |                                               |                 |                                                                               |                 |
| 0-17                                          | (reference)                        |                 | (reference)                                   |                 | (reference)                                                                   |                 |
| 18-26                                         | 1.796                              | (1.565-2.059)   | 2.403                                         | (2.034-2.839)   | 2.538                                                                         | (2.067-3.118)   |
| 27-44                                         | 2.243                              | (2.006-2.512)   | 3.074                                         | (2.672-3.547)   | 3.214                                                                         | (2.701-3.842)   |
| 45-64                                         | 4.534                              | (4.109-5.015)   | 4.818                                         | (4.237-5.5)     | 4.732                                                                         | (4.035-5.584)   |
| ≥65                                           | 10.717                             | (9.657-11.916)  | 14.066                                        | (12.314-16.125) | 13.771                                                                        | (11.644-16.372) |
| <b>Female sex</b>                             | 1.209                              | (1.149-1.272)   | 1.375                                         | (1.292-1.464)   | 1.404                                                                         | (1.292-1.527)   |
| <b>Year</b>                                   |                                    |                 |                                               |                 |                                                                               |                 |
| 2001                                          | (reference)                        |                 | (reference)                                   |                 | (reference)                                                                   |                 |
| 2002                                          | 1.37                               | (0.919-2.084)   | 1.103                                         | (0.66-1.886)    | 1.069                                                                         | (0.513-2.331)   |

|              |             |               |             |                |             |                |
|--------------|-------------|---------------|-------------|----------------|-------------|----------------|
| 2003         | 1.414       | (0.969-2.116) | 1.077       | (0.662-1.807)  | 1.033       | (0.517-2.194)  |
| 2004         | 1.737       | (1.216-2.555) | 1.36        | (0.868-2.22)   | 1.267       | (0.67-2.597)   |
| 2005         | 1.944       | (1.372-2.842) | 1.617       | (1.049-2.608)  | 1.564       | (0.852-3.147)  |
| 2006         | 1.962       | (1.39-2.861)  | 1.788       | (1.169-2.867)  | 1.711       | (0.944-3.414)  |
| 2007         | 2.256       | (1.606-3.276) | 1.762       | (1.155-2.821)  | 1.712       | (0.949-3.405)  |
| 2008         | 2.614       | (1.875-3.771) | 2.021       | (1.341-3.204)  | 2.035       | (1.152-3.995)  |
| 2009         | 2.709       | (1.946-3.905) | 2.543       | (1.698-4.014)  | 2.542       | (1.451-4.962)  |
| 2010         | 2.82        | (2.025-4.066) | 2.886       | (1.928-4.552)  | 2.969       | (1.698-5.786)  |
| 2011         | 3.292       | (2.371-4.736) | 3.409       | (2.288-5.362)  | 3.576       | (2.057-6.943)  |
| 2012         | 3.586       | (2.585-5.155) | 3.88        | (2.607-6.095)  | 4.087       | (2.356-7.923)  |
| 2013         | 3.684       | (2.652-5.301) | 4.005       | (2.687-6.299)  | 4.244       | (2.442-8.238)  |
| 2014         | 3.966       | (2.856-5.706) | 4.392       | (2.948-6.904)  | 4.711       | (2.714-9.138)  |
| 2015         | 4.261       | (3.056-6.148) | 5.65        | (3.788-8.891)  | 6.239       | (3.59-12.112)  |
| 2016         | 4.487       | (3.219-6.474) | 6.518       | (4.375-10.247) | 7.239       | (4.171-14.039) |
| 2017         | 4.121       | (2.944-5.967) | 5.983       | (4-9.435)      | 6.574       | (3.77-12.79)   |
| <b>Month</b> |             |               |             |                |             |                |
| January      | (reference) |               | (reference) |                | (reference) |                |
| February     | 0.709       | (0.627-0.802) | 0.594       | (0.51-0.69)    | 0.557       | (0.456-0.68)   |
| March        | 0.585       | (0.518-0.66)  | 0.476       | (0.411-0.552)  | 0.443       | (0.364-0.539)  |
| April        | 0.575       | (0.509-0.65)  | 0.47        | (0.405-0.546)  | 0.443       | (0.364-0.54)   |
| May          | 0.569       | (0.503-0.643) | 0.472       | (0.407-0.548)  | 0.444       | (0.364-0.541)  |
| June         | 0.592       | (0.523-0.669) | 0.503       | (0.433-0.583)  | 0.471       | (0.386-0.575)  |
| July         | 0.591       | (0.522-0.668) | 0.491       | (0.423-0.571)  | 0.479       | (0.393-0.584)  |
| August       | 0.606       | (0.536-0.684) | 0.504       | (0.433-0.585)  | 0.477       | (0.391-0.582)  |
| September    | 0.613       | (0.541-0.693) | 0.522       | (0.449-0.606)  | 0.508       | (0.416-0.619)  |
| October      | 0.605       | (0.535-0.684) | 0.512       | (0.441-0.594)  | 0.49        | (0.402-0.597)  |
| November     | 0.578       | (0.51-0.655)  | 0.48        | (0.412-0.559)  | 0.468       | (0.383-0.572)  |
| December     | 0.572       | (0.505-0.647) | 0.464       | (0.399-0.54)   | 0.433       | (0.354-0.53)   |

**eTable 2. Results for Hospital Onset CDI cases**

| Coefficient                                   | Hospital Onset CDI |                | Hospital Onset CDI (no prior hospitalization) |                 |
|-----------------------------------------------|--------------------|----------------|-----------------------------------------------|-----------------|
|                                               | Estimate           | 95% CI         | Estimate                                      | 95% CI          |
| <b>(Intercept)</b>                            | 0                  | (0-0)          | 0                                             | (0-0)           |
| <b>Family Exposure</b>                        | 6.733              | (3.299-11.995) | 8.868                                         | (3.561-17.885)  |
| <b>Family Exposure: dependent (age 18-26)</b> | 0.23               | (0-6.57)       | 0.252                                         | (0-9.561)       |
| <b>Age Group</b>                              |                    |                |                                               |                 |
| 0-17                                          | (reference)        |                | (reference)                                   |                 |
| 18-26                                         | 1.527              | (1.289-1.805)  | 1.667                                         | (1.316-2.105)   |
| 27-44                                         | 1.874              | (1.637-2.148)  | 2.195                                         | (1.817-2.659)   |
| 45-64                                         | 4.416              | (3.935-4.97)   | 4.772                                         | (4.058-5.645)   |
| ≥65                                           | 9.253              | (8.179-10.495) | 18.123                                        | (15.348-21.522) |
| <b>Female sex</b>                             | 1.12               | (1.053-1.191)  | 1.162                                         | (1.067-1.266)   |
| <b>Prior antibiotic use</b>                   |                    |                |                                               |                 |
| None                                          | (reference)        |                | (reference)                                   |                 |
| Low-risk antibiotic                           | 3.083              | (2.792-3.398)  | 3.757                                         | (3.276-4.291)   |
| High-risk antibiotic                          | 6.973              | (6.416-7.572)  | 13.795                                        | (12.385-15.341) |
| <b>Prior Hospitalization</b>                  | 22.49              | (20.90-24.20)  | N/A                                           |                 |
| <b>Year</b>                                   |                    |                |                                               |                 |
| 2001                                          | (reference)        |                | (reference)                                   |                 |
| 2002                                          | 1.512              | (0.943-2.5)    | 1.481                                         | (0.796-2.902)   |
| 2003                                          | 1.59               | (1.017-2.582)  | 1.519                                         | (0.844-2.911)   |
| 2004                                          | 1.931              | (1.265-3.079)  | 1.796                                         | (1.033-3.363)   |
| 2005                                          | 2.115              | (1.397-3.353)  | 1.958                                         | (1.14-3.638)    |
| 2006                                          | 2.047              | (1.356-3.239)  | 1.884                                         | (1.101-3.492)   |
| 2007                                          | 2.505              | (1.672-3.942)  | 2.249                                         | (1.329-4.136)   |
| 2008                                          | 2.912              | (1.961-4.551)  | 2.552                                         | (1.529-4.648)   |

|              |             |               |             |               |
|--------------|-------------|---------------|-------------|---------------|
| 2009         | 2.782       | (1.874-4.348) | 2.472       | (1.482-4.5)   |
| 2010         | 2.774       | (1.867-4.338) | 2.526       | (1.512-4.601) |
| 2011         | 3.22        | (2.174-5.022) | 2.908       | (1.75-5.277)  |
| 2012         | 3.42        | (2.311-5.332) | 3.134       | (1.89-5.683)  |
| 2013         | 3.502       | (2.362-5.468) | 3.204       | (1.927-5.819) |
| 2014         | 3.732       | (2.518-5.824) | 3.354       | (2.018-6.089) |
| 2015         | 3.503       | (2.345-5.499) | 3.211       | (1.91-5.875)  |
| 2016         | 3.392       | (2.267-5.333) | 3.086       | (1.831-5.656) |
| 2017         | 3.136       | (2.082-4.952) | 2.964       | (1.744-5.463) |
| <b>Month</b> |             |               |             |               |
| January      | (reference) |               | (reference) |               |
| February     | 0.773       | (0.666-0.898) | 0.719       | (0.587-0.88)  |
| March        | 0.648       | (0.559-0.751) | 0.6         | (0.491-0.733) |
| April        | 0.636       | (0.547-0.738) | 0.596       | (0.486-0.73)  |
| May          | 0.623       | (0.537-0.723) | 0.58        | (0.473-0.71)  |
| June         | 0.64        | (0.55-0.743)  | 0.603       | (0.491-0.74)  |
| July         | 0.646       | (0.557-0.75)  | 0.612       | (0.499-0.75)  |
| August       | 0.663       | (0.572-0.77)  | 0.636       | (0.519-0.778) |
| September    | 0.662       | (0.569-0.769) | 0.628       | (0.511-0.77)  |
| October      | 0.657       | (0.566-0.762) | 0.625       | (0.51-0.765)  |
| November     | 0.633       | (0.544-0.737) | 0.607       | (0.493-0.745) |
| December     | 0.634       | (0.546-0.737) | 0.611       | (0.498-0.748) |
